# Supplementary material for: A general method for the preparation of a thickness-controllable fluoro-containing organic film as a solid lubricant
Source: Royal Society of Chemistry journal article supplement (doi:10.1039/c5ra03900b), 2015-01-01
Supplement: c5ra03900b1.pdf [file c5ra03900b1.pdf]

## A General Method for the Preparation of Thickness-Controllable Fluoro-Containing Organic Film as Solid Lubricant

Hongyu Liang,<sup>a,b</sup> Yongfeng Bu,<sup>c</sup> Jianning Ding,<sup>d</sup> and Junyan Zhang<sup>a,\*</sup>

<sup>a</sup>State Key Laboratory of Solid Lubrication, Lanzhou Institute of Chemical Physics, Chinese Academy of Sciences, Lanzhou 730000, China

<sup>b</sup>University of Chinese Academy of Sciences, Beijing 100049, China

<sup>c</sup>Key Laboratory of Mesoscopic Chemistry of MOE and Jiangsu Provincial Lab for Nanotechnology, School of Chemistry and Chemical Engineering, Nanjing University, Nanjing 210093, China

<sup>d</sup>Center for Low-Dimensional Materials, Micro-Nano Devices and System, Jiangsu Key Laboratory for Solar Cell Materials and Technology, Jiangsu Collaborative Innovation Center of Photovoltaic Science and Engineering, Changzhou University, Changzhou 213164, China

\*E-mail: [zhangjunyan@licp.cas.cn](mailto:zhangjunyan@licp.cas.cn) Tel./fax: +86 9314968295

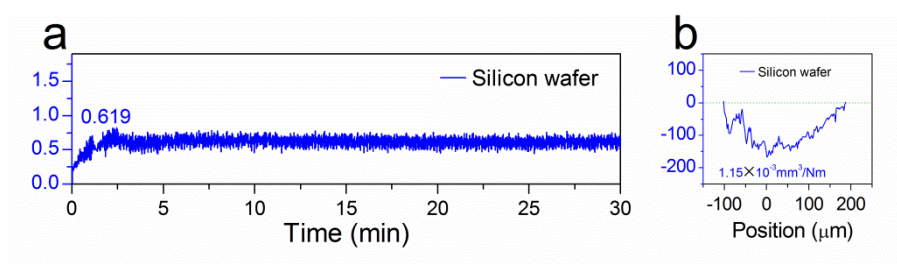

**Figure S1.** (a) Friction coefficient vs. time curve and (b) 2D profile plot of wear track for bare silicon wafer. Conditions for friction experiments: load = 20 mN, sliding velocity = 0.01 m/s.

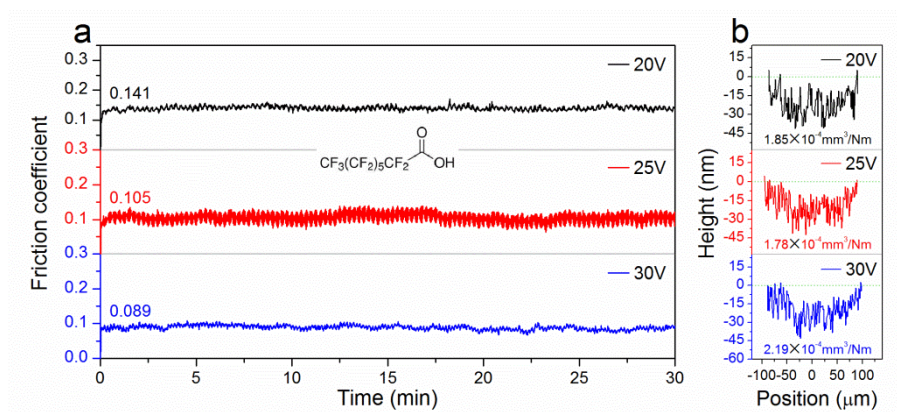

**Figure S2.** (a) Friction coefficient vs. time curves and (b) 2D profile plots of wear tracks of perfluorocaprylic acid films deposited at various voltages (20-30 V). Conditions for friction experiments: load = 20 mN, sliding velocity = 0.01 m/s.

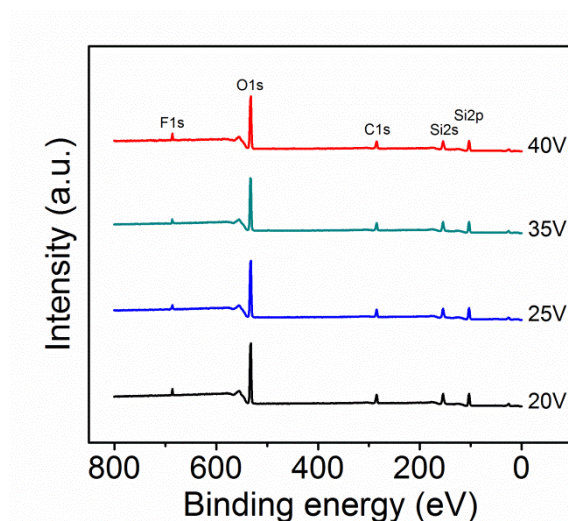

**Figure S3.** The full spectra of the films deposited at 20V, 25V, 35V and 40V.

**Table S1.** Contact angles of water and glycol and surface energy values of the TFA films

| Sample | Contact angle (°) |        | Surface energy ( $\text{mJ}/\text{m}^2$ ) |                      |                    |
|--------|-------------------|--------|-------------------------------------------|----------------------|--------------------|
|        | Water             | Glycol | Dispersive ( $\gamma^d$ )                 | Polar ( $\gamma^p$ ) | Total ( $\gamma$ ) |
| TF20   | 64.1              | 41.5   | 16.2                                      | 22.0                 | 38.2               |
| TF25   | 74.7              | 49.4   | 21.1                                      | 11.8                 | 32.9               |
| TF30   | 78.9              | 52.2   | 23.6                                      | 8.4                  | 32.0               |
| TF35   | 76.6              | 50.9   | 22.0                                      | 10.3                 | 32.3               |
| TF40   | 66.3              | 42.9   | 17.4                                      | 19.5                 | 36.9               |

## The calculation method of surface energy:

The calculation method of surface energy is on the basis of the Owens and Wendt theoretical models (Eq. (1), [1]) by measuring the contact angle values of water and glycol of the films deposited at different voltages (20-40 V), respectively. The values of the dispersive ( $\gamma^d$ ) and polar( $\gamma^p$ ) components of ultrapure water and glycol are shown in the following table [2].

| Liquid          | Dispersive component<br>( $\gamma^d$ , mJ/m <sup>2</sup> ) | Polar component<br>( $\gamma^p$ , mJ/m <sup>2</sup> ) | Surface energy<br>( $\gamma$ , mJ/m <sup>2</sup> ) |
|-----------------|------------------------------------------------------------|-------------------------------------------------------|----------------------------------------------------|
| Ultrapure water | 21.8                                                       | 51.0                                                  | 72.8                                               |
| Glycol          | 29.3                                                       | 19.0                                                  | 48.3                                               |

Therefore, dispersive,  $\gamma^d$  and polar,  $\gamma^p$ , components of the surface energy of each film can be obtained using the following equations:

$$\gamma_L (1 + \cos\theta) = 2 ( (\gamma_L^d \gamma_S^d)^{1/2} + (\gamma_L^p \gamma_S^p)^{1/2} ) \quad (1)$$

where  $\theta$  is the contact angle,  $\gamma_L$  and  $\gamma_S$  are related to the liquid surface energy and solid surface energy, respectively. Combined with the Fowkes method (Eq. (2), [3]), the total surface energy is the sum of contributions from the different intermolecular forces at the surface, thus the surface energy ( $\gamma$ ) of each film could be calculated using the following equation:

$$\gamma = \gamma^d + \gamma^p \quad (2)$$

[1] D. K. Owens, Wendt, Estimation of the surface free energy of polymers. *Journal of Applied Polymer Science*, 1969, **13**, 1741-1747.

[2] N. Huang, P. Yang, Y. X. Leng, *et al.* Hemocompatibility of titanium oxide films. *Biomaterials*, 2003, **24**, 2177-2187.

[3] F. M. Fowkes, Attractive forces at interfaces. *Journal of Industrial and Engineering Chemistry*, 1964, **56**, 40-52.
